# Supplementary material for: Molecular Portrait of Oral Tongue Squamous Cell Carcinoma Shown by Integrative Meta-Analysis of Expression Profiles with Validations
Source: PLoS One. 2016 Jun 9;11(6):e0156582. doi: 10.1371/journal.pone.0156582 (PMC4900586; doi:10.1371/journal.pone.0156582)
Supplement: S2 Table — (XLS) [file pone.0156582.s002.xls]

## Sheet: INMEX_result_effectsize (4)
EntrezID	Name	CombinedES	Pval
3131	HLF	-2.1969	0
11170	FAM107A	-2.1871	0.00017041
23171	GPD1L	-2.1232	9.3751e-10
23328	SASH1	-2.1219	2.9007e-09
9413	FAM189A2	-2.0904	0
4129	MAOB	-2.0519	0
2012	EMP1	-2.0377	0.004744
8991	SELENBP1	-2.0319	0.00024964
9145	SYNGR1	-1.9467	0
7123	CLEC3B	-1.9228	0.0020399
58528	RRAGD	-1.9067	7.5362e-09
11343	MGLL	-1.9019	8.8729e-12
2053	EPHX2	-1.8859	1.4906e-05
84525	HOPX	-1.8813	0.013522
4258	MGST2	-1.83	7.1538e-09
8909	ENDOU	-1.805	0.020125
1675	CFD	-1.8041	8.0779e-05
23242	COBL	-1.801	0.0032195
5549	PRELP	-1.8009	1.8656e-09
2949	GSTM5	-1.7977	3.63e-06
5507	PPP1R3C	-1.7834	9.6735e-12
66002	CYP4F12	-1.7735	2.9888e-09
22849	CPEB3	-1.741	4.1755e-08
5037	PEBP1	-1.7342	0
3248	HPGD	-1.7071	2.3291e-07
5412	UBL3	-1.707	0
25840	METTL7A	-1.6913	0
1577	CYP3A5	-1.6826	1.3207e-09
443	ASPA	-1.6796	0.0022601
224	ALDH3A2	-1.6764	0
23175	LPIN1	-1.6741	7.3788e-13
1350	COX7C	-1.6615	0
239	ALOX12	-1.6598	1.194e-06
1346	COX7A1	-1.6586	0.00014786
1805	DPT	-1.6492	1.4271e-12
3851	KRT4	-1.6291	2.2959e-05
4239	MFAP4	-1.6221	2.5333e-12
4118	MAL	-1.6192	0.00097823
23492	CBX7	-1.616	2.4452e-11
5138	PDE2A	-1.6135	6.3615e-08
4629	MYH11	-1.6126	0.00089105
4925	NUCB2	-1.6098	3.8824e-06
10351	ABCA8	-1.6016	3.977e-06
7049	TGFBR3	-1.5944	4.0205e-07
343990	C2orf55	-1.5861	2.9066e-07
6542	SLC7A2	-1.5788	9.5185e-07
56271	BEX4	-1.5745	3.4124e-08
7103	TSPAN8	-1.5743	0.00035907
23564	DDAH2	-1.5674	1.321e-13
5162	PDHB	-1.5604	3.4929e-14
5083	PAX9	-1.5577	0.00024413
25924	MYRIP	-1.5499	0.0042455
5087	PBX1	-1.5498	4.714e-09
7089	TLE2	-1.5484	7.3866e-07
8483	CILP	-1.5473	0
4306	NR3C2	-1.5405	4.7685e-05
23593	HEBP2	-1.5382	8.0389e-05
5348	FXYD1	-1.5381	0.0094911
6649	SOD3	-1.5295	0.0013656
5468	PPARG	-1.5263	0.0011201
6138	RPL15	-1.5186	1.0212e-05
3033	HADH	-1.518	7.0934e-05
8796	SCEL	-1.5161	0.0069193
6338	SCNN1B	-1.5158	4.2376e-07
8648	NCOA1	-1.512	1.8199e-10
5325	PLAGL1	-1.5095	6.0544e-13
831	CAST	-1.5094	8.0779e-05
2110	ETFDH	-1.5084	4.4658e-08
10231	RCAN2	-1.5065	2.6936e-11
10321	CRISP3	-1.504	0
5764	PTN	-1.501	0
26050	SLITRK5	-1.4941	7.7641e-06
2662	GDF10	-1.4841	0.01722
5239	PGM5	-1.4839	0.00098531
10641	NPRL2	-1.4619	3.0802e-06
1153	CIRBP	-1.4595	4.2956e-07
9778	KIAA0232	-1.4573	0
9120	SLC16A6	-1.4571	0.0050022
8425	LTBP4	-1.4561	6.6788e-06
10284	SAP18	-1.4537	4.5987e-06
6038	RNASE4	-1.4534	3.0346e-08
4784	NFIX	-1.4478	4.6045e-05
3615	IMPDH2	-1.4475	2.2217e-07
8850	KAT2B	-1.4471	1.0573e-12
9452	ITM2A	-1.447	9.2778e-08
8470	SORBS2	-1.4409	0
154796	AMOT	-1.4395	0.00075538
347	APOD	-1.439	4.559e-06
3590	IL11RA	-1.4336	0.032696
291	SLC25A4	-1.432	0.009372
4781	NFIB	-1.4307	5.9269e-05
9045	RPL14	-1.4272	1.0857e-05
125	ADH1B	-1.4232	0.0045091
5354	PLP1	-1.4218	0.0016502
5894	RAF1	-1.4205	3.9125e-07
3400	ID4	-1.4057	0.013871
5493	PPL	-1.4038	0.0051983
947	CD34	-1.4022	1.0884e-05
2525	FUT3	-1.4	0.00016335
3488	IGFBP5	-1.3998	9.5542e-07
5502	PPP1R1A	-1.3893	0.030319
8788	DLK1	-1.3837	0.018347
498	ATP5A1	-1.3735	3.4929e-14
2327	FMO2	-1.3731	4.0321e-07
223	ALDH9A1	-1.3706	6.0665e-05
3075	CFH	-1.3699	0.0031369
8613	PPAP2B	-1.3655	8.7329e-08
83989	FAM172A	-1.365	1.1046e-05
1087	CEACAM7	-1.364	0.00032062
6493	SIM2	-1.356	1.0091e-13
1622	DBI	-1.3549	0.046827
55	ACPP	-1.3548	0.038414
32	ACACB	-1.3533	0.0031988
22874	PLEKHA6	-1.3498	4.3943e-13
23460	ABCA6	-1.3479	0.0013555
147339	C18orf25	-1.3443	0.0067296
4005	LMO2	-1.3426	3.6231e-05
4774	NFIA	-1.3397	1.0225e-06
8801	SUCLG2	-1.3299	0.0012855
1410	CRYAB	-1.3297	1.2104e-05
10425	ARIH2	-1.3267	0.0043836
8522	GAS7	-1.3232	1.6833e-10
6867	TACC1	-1.3185	2.1845e-12
27134	TJP3	-1.3177	8.5312e-13
9649	RALGPS1	-1.3151	2.6899e-08
4211	MEIS1	-1.3127	6.2982e-05
9333	TGM5	-1.3063	0.027561
6387	CXCL12	-1.3022	0.0005865
7053	TGM3	-1.302	0.009148
25854	FAM149A	-1.3018	0.00019792
539	ATP5O	-1.3014	6.15e-10
64777	RMND5B	-1.3012	0.012919
23177	CEP68	-1.2978	0.0085691
6368	CCL23	-1.2961	8.5186e-05
10632	ATP5L	-1.2957	9.0843e-06
38	ACAT1	-1.2932	4.8212e-05
9377	COX5A	-1.2899	8.383e-13
23635	SSBP2	-1.2894	0.00094259
10628	TXNIP	-1.2876	0.0054367
8404	SPARCL1	-1.287	1.2236e-05
1893	ECM1	-1.2855	0.013126
80303	EFHD1	-1.2854	3.0641e-05
217	ALDH2	-1.2846	7.0864e-09
2145	EZH1	-1.2833	0.0069116
2532	DARC	-1.2825	1.9604e-05
10443	N4BP2L2	-1.2817	1.8144e-11
9588	PRDX6	-1.2793	1.4271e-12
311	ANXA11	-1.2783	0.0032195
9812	KIAA0141	-1.2694	2.3491e-12
11005	SPINK5	-1.2671	0.015459
6470	SHMT1	-1.2669	3.6097e-12
126393	HSPB6	-1.2655	0.016792
3983	ABLIM1	-1.2646	0.013985
4137	MAPT	-1.2643	0.00016685
5520	PPP2R2A	-1.2624	0.00011922
10252	SPRY1	-1.2611	0.0023823
2934	GSN	-1.2593	2.0892e-10
81550	TDRD3	-1.2588	5.1246e-11
2690	GHR	-1.2572	0.00032363
4122	MAN2A2	-1.2571	0.002451
81563	C1orf21	-1.2558	0.00032115
7113	TMPRSS2	-1.2557	2.43e-09
1571	CYP2E1	-1.254	6.326e-05
634	CEACAM1	-1.254	0.0035546
4223	MEOX2	-1.253	0.00011287
27089	UQCRQ	-1.2519	3.1779e-07
726	CAPN5	-1.2512	0.0034958
7704	ZBTB16	-1.2509	0.00025149
8209	C21orf33	-1.2504	6.4828e-05
90634	N4BP2L1	-1.249	0.00029165
1562	CYP2C18	-1.2485	0.024259
10370	CITED2	-1.2468	5.5793e-09
7844	RNF103	-1.2449	5.1389e-12
22881	ANKRD6	-1.2445	2.5787e-07
9211	LGI1	-1.2433	4.3819e-12
2632	GBE1	-1.2413	3.443e-08
2139	EYA2	-1.241	9.0427e-09
9852	EPM2AIP1	-1.2395	5.7733e-12
3169	FOXA1	-1.2386	0.0023594
4653	MYOC	-1.2351	0.00085136
4256	MGP	-1.2306	1.4506e-06
9201	DCLK1	-1.2292	0.0031988
51350	KRT76	-1.2288	2.0313e-05
6097	RORC	-1.2286	3.2363e-08
34	ACADM	-1.2264	0.0050681
5224	PGAM2	-1.2242	0.0092026
8434	RECK	-1.2226	7.675e-05
28513	CDH19	-1.2148	0.0018556
22885	ABLIM3	-1.2111	0.0021941
3709	ITPR2	-1.2109	0.00020737
2803	GOLGA4	-1.2107	1.9143e-05
53405	CLIC5	-1.2092	0.039282
3953	LEPR	-1.2016	0.0045447
2819	GPD1	-1.2012	0.010553
11155	LDB3	-1.2007	0.016736
7018	TF	-1.1979	0.0033805
4694	NDUFA1	-1.197	0.00049374
37	ACADVL	-1.1909	1.8484e-09
11045	UPK1A	-1.1901	0.0020119
3860	KRT13	-1.1898	0.0011163
10129	FRY	-1.1859	0.00033243
6392	SDHD	-1.1856	1.6646e-08
23479	ISCU	-1.1836	0.0002296
9896	FIG4	-1.1829	1.6833e-10
8309	ACOX2	-1.18	5.5279e-11
4286	MITF	-1.1767	0.00024577
25802	LMOD1	-1.1765	0.00014933
10048	RANBP9	-1.1753	0.022686
1524	CX3CR1	-1.1727	1.1842e-06
3158	HMGCS2	-1.1725	1.283e-05
5178	PEG3	-1.1721	5.6615e-11
22906	TRAK1	-1.168	6.0226e-11
900	CCNG1	-1.167	0.0062788
2272	FHIT	-1.1649	3.7533e-06
8493	PPM1D	-1.1644	1.4336e-08
2487	FRZB	-1.1634	0.0022364
2273	FHL1	-1.1629	4.0467e-05
7122	CLDN5	-1.1616	0.045799
10974	C10orf116	-1.1613	4.3088e-05
6445	SGCG	-1.1602	2.4531e-07
5108	PCM1	-1.1585	4.4943e-05
9728	SECISBP2L	-1.1572	4.2385e-06
5569	PKIA	-1.1568	0.033034
1734	DIO2	-1.1554	0.0028128
57134	MAN1C1	-1.1541	0.011601
7508	XPC	-1.1536	0.00044415
10529	NEBL	-1.1494	0.028782
522	ATP5J	-1.149	1.3752e-10
22915	MMRN1	-1.1428	0.0053096
1847	DUSP5	-1.1387	0.018126
3316	HSPB2	-1.1365	0.0012902
5166	PDK4	-1.136	3.6286e-07
8030	CCDC6	-1.1358	0.037534
477	ATP1A2	-1.1355	0.033618
10253	SPRY2	-1.1344	0.024298
2766	GMPR	-1.1337	0.0059524
652	BMP4	-1.133	0.00012129
5264	PHYH	-1.133	0.040215
473	RERE	-1.1296	0.023949
23066	CAND2	-1.1275	0.025168
80740	LY6G6C	-1.1261	1.0212e-05
1576	CYP3A4	-1.1252	0.0061048
316	AOX1	-1.1231	0.00013172
4916	NTRK3	-1.1225	0.017051
5257	PHKB	-1.1207	5.5793e-09
5307	PITX1	-1.1185	0.015394
4717	NDUFC1	-1.1153	9.0392e-06
6532	SLC6A4	-1.1143	4.0527e-10
5350	PLN	-1.1139	0.01254
10449	ACAA2	-1.1133	5.512e-10
57658	CALCOCO1	-1.1131	0.00032677
23090	ZNF423	-1.113	4.4837e-10
825	CAPN3	-1.1127	0.0016586
13	AADAC	-1.1124	0.028989
25849	PARM1	-1.1097	0.00060366
3032	HADHB	-1.1096	0.010613
27013	CNPPD1	-1.1092	1.2369e-09
26085	KLK13	-1.108	0.048098
3176	HNMT	-1.1079	3.1084e-07
10497	UNC13B	-1.1077	5.6121e-10
27347	STK39	-1.1045	0.041658
85453	TSPYL5	-1.1041	0.0017957
5104	SERPINA5	-1.1028	1.2205e-06
2159	F10	-1.1022	6.9276e-10
358	AQP1	-1.0998	4.0444e-07
4636	MYL5	-1.0986	0.0012265
64795	RMND5A	-1.0966	0.00027134
7419	VDAC3	-1.0939	2.7327e-09
847	CAT	-1.0936	8.9287e-10
10507	SEMA4D	-1.0932	5.8148e-06
6840	SVIL	-1.0922	8.2154e-05
2312	FLG	-1.0915	0.018824
689	BTF3	-1.0876	4.1387e-08
57211	GPR126	-1.0867	1.0441e-09
287	ANK2	-1.0842	0.0009752
8736	MYOM1	-1.0824	0.021679
1573	CYP2J2	-1.08	1.4139e-09
9079	LDB2	-1.08	0.00022088
7010	TEK	-1.0762	3.2376e-05
25777	SUN2	-1.0758	1.4952e-09
5287	PIK3C2B	-1.0751	9.5229e-06
7026	NR2F2	-1.0745	0.043486
10550	ARL6IP5	-1.0735	0.0063121
9748	SLK	-1.0728	0.015199
1191	CLU	-1.0721	0.0011079
9700	ESPL1	-1.0713	0.014655
22798	LAMB4	-1.0711	3.2837e-07
10614	HEXIM1	-1.0692	4.341e-06
4008	LMO7	-1.0659	0.0029843
11078	TRIOBP	-1.0659	0.011076
218	ALDH3A1	-1.0648	0.0055806
6272	SORT1	-1.0648	0.020624
5295	PIK3R1	-1.0647	5.4856e-05
65018	PINK1	-1.0617	2.5722e-09
1036	CDO1	-1.061	0.0036119
2528	FUT6	-1.0607	0.002255
5095	PCCA	-1.0604	7.7916e-05
221061	FAM171A1	-1.0579	4.4741e-05
2872	MKNK2	-1.0576	2.7327e-09
6779	STATH	-1.0575	3.6153e-06
367	AR	-1.0574	0.0004541
5204	PFDN5	-1.0573	2.7832e-09
6160	RPL31	-1.0563	0.0001943
3913	LAMB2	-1.0548	1.2537e-05
83604	TMEM47	-1.0533	0.014305
26234	FBXL5	-1.0529	3.6923e-09
2593	GAMT	-1.0529	0.0029911
89927	C16orf45	-1.0525	0.00041202
3579	CXCR2	-1.0523	0.011998
6422	SFRP1	-1.0498	0.0047165
256364	EML3	-1.0494	0.0044507
51585	PCF11	-1.0487	0.017878
6604	SMARCD3	-1.0481	0.044036
2628	GATM	-1.048	0.018381
57509	MTUS1	-1.0476	0.0027876
1339	COX6A2	-1.0471	0.01084
9921	RNF10	-1.0433	4.717e-09
7867	MAPKAPK3	-1.0403	5.2052e-09
9073	CLDN8	-1.04	5.3666e-09
84869	CBR4	-1.04	1.2448e-05
6457	SH3GL3	-1.0397	0.038657
10241	CALCOCO2	-1.039	0.0037897
4487	MSX1	-1.0387	1.5515e-05
788	SLC25A20	-1.0385	0.0050681
2878	GPX3	-1.0381	0.00049245
5136	PDE1A	-1.0379	0.016063
23641	LDOC1	-1.0376	5.8601e-09
253959	RALGAPA1	-1.035	0.0057828
5243	ABCB1	-1.0326	0.0013903
1408	CRY2	-1.0326	0.0016051
256949	KANK3	-1.0314	0.036663
2252	FGF7	-1.031	0.045005
8416	ANXA9	-1.0309	0.014402
26020	LRP10	-1.0306	0.0053034
7375	USP4	-1.0296	0.0015409
1730	DIAPH2	-1.0286	0.0001144
7593	MZF1	-1.0281	0.0060949
7108	TM7SF2	-1.0275	4.0635e-05
10579	TACC2	-1.0259	0.00779
9322	TRIP10	-1.0241	2.6984e-08
115207	KCTD12	-1.0218	0.00024577
6337	SCNN1A	-1.0187	0.00060627
5308	PITX2	-1.0176	0.00276
4023	LPL	-1.0167	0.022472
8639	AOC3	-1.0157	0.018237
79026	AHNAK	-1.0155	0.021204
23576	DDAH1	-1.0147	9.0221e-06
7111	TMOD1	-1.014	0.0084576
1910	EDNRB	-1.0133	0.022666
283	ANG	-1.0125	1.2311e-08
2060	EPS15	-1.0097	0.010018
36	ACADSB	-1.0059	0.018713
1329	COX5B	-1.0024	0.012293
23189	KANK1	-1.0017	0.040215
216	ALDH1A1	-1.0013	0.02622
23254	KAZN	-1.0012	0.0013788
513	ATP5D	-1.0011	0.0078155
9104	RGN	-0.99866	0.01207
25957	PNISR	-0.99599	2.6568e-05
1559	CYP2C9	-0.99575	0.03966
5179	PENK	-0.99455	0.0015872
22875	ENPP4	-0.99386	0.0023387
687	KLF9	-0.9935	0.015039
729	C6	-0.9919	0.0021948
1048	CEACAM5	-0.99182	0.003099
23461	ABCA5	-0.99154	2.6535e-08
10873	ME3	-0.99035	0.0044537
2752	GLUL	-0.99024	1.4763e-05
98	ACYP2	-0.98992	0.0044507
11030	RBPMS	-0.98936	2.6551e-08
5733	PTGER3	-0.98566	2.6899e-08
2192	FBLN1	-0.98512	2.9431e-08
4190	MDH1	-0.98367	8.8819e-05
6430	SRSF5	-0.98278	2.4409e-05
9249	DHRS3	-0.98191	3.1324e-08
112	ADCY6	-0.9818	1.1874e-06
114876	OSBPL1A	-0.97883	0.00010728
10516	FBLN5	-0.97871	0.020255
84302	C9orf125	-0.97787	0.00044415
8864	PER2	-0.97776	0.006318
2277	FIGF	-0.97475	0.015584
3195	TLX1	-0.97446	0.015954
7025	NR2F1	-0.97379	0.0060949
9256	BZRAP1	-0.97337	0.0048582
3295	HSD17B4	-0.97321	0.00080686
26576	SRPK3	-0.97313	0.01584
51454	GULP1	-0.97221	0.0098956
11261	CHP	-0.97179	0.0021559
8615	USO1	-0.97178	0.0012116
4826	NNAT	-0.97113	0.0010477
7082	TJP1	-0.97043	0.0038473
645	BLVRB	-0.96971	0.0074379
859	CAV3	-0.96943	0.012695
1917	EEF1A2	-0.96844	0.049966
7079	TIMP4	-0.96792	0.023064
1528	CYB5A	-0.96787	0.02242
2051	EPHB6	-0.96214	0.0030648
5787	PTPRB	-0.96183	0.00020427
5525	PPP2R5A	-0.9615	4.2385e-06
4724	NDUFS4	-0.95987	0.0082936
6146	RPL22	-0.95889	0.0014406
11341	SCRG1	-0.95869	0.0064566
7381	UQCRB	-0.95588	0.00076575
2180	ACSL1	-0.9557	0.0056816
92	ACVR2A	-0.95563	0.0038504
2006	ELN	-0.9551	3.2975e-05
6500	SKP1	-0.95507	0.00048972
1891	ECH1	-0.95473	2.9456e-06
9542	NRG2	-0.95441	7.0051e-05
9936	CD302	-0.95401	0.033374
7001	PRDX2	-0.95388	0.0074379
9581	PREPL	-0.95265	2.7476e-06
4782	NFIC	-0.95191	1.5856e-05
5869	RAB5B	-0.95147	8.7176e-08
1740	DLG2	-0.95119	0.013552
6275	S100A4	-0.94878	0.030339
7504	XK	-0.94843	0.0096082
57447	NDRG2	-0.94559	1.7844e-05
11345	GABARAPL2	-0.94162	1.168e-07
157567	ANKRD46	-0.94027	2.7658e-07
4303	FOXO4	-0.9402	1.2429e-07
5438	POLR2I	-0.93996	0.010137
27163	NAAA	-0.93983	0.0094192
2791	GNG11	-0.93806	0.014705
23371	TENC1	-0.93658	0.0019932
7320	UBE2B	-0.93447	0.00057928
21	ABCA3	-0.93279	0.0020784
27335	EIF3K	-0.93192	1.5868e-07
8000	PSCA	-0.93158	1.4752e-07
6820	SULT2B1	-0.93076	0.028515
57149	LYRM1	-0.9304	1.6348e-07
5595	MAPK3	-0.92923	9.8734e-05
1349	COX7B	-0.92721	0.00010345
79071	ELOVL6	-0.92622	1.8904e-06
10982	MAPRE2	-0.92467	0.0039702
5269	SERPINB6	-0.92446	2.479e-05
8890	EIF2B4	-0.92422	0.0011317
6124	RPL4	-0.92349	5.0631e-06
10181	RBM5	-0.92289	2.0027e-07
1593	CYP27A1	-0.92241	0.00027723
7385	UQCRC2	-0.92161	1.753e-06
4701	NDUFA7	-0.92112	2.4845e-05
4259	MGST3	-0.91957	2.0574e-07
4329	ALDH6A1	-0.91836	0.0059658
6196	RPS6KA2	-0.91813	2.2135e-07
2719	GPC3	-0.91433	0.040913
154661	RUNDC3B	-0.91329	0.015435
427	ASAH1	-0.91258	0.049658
7263	TST	-0.90944	0.00081584
7360	UGP2	-0.90749	0.0037837
10491	CRTAP	-0.9053	2.3237e-05
8490	RGS5	-0.90422	0.0021941
6293	VPS52	-0.90419	5.9675e-07
8082	SSPN	-0.90332	0.0057532
3029	HAGH	-0.90073	3.6286e-07
901	CCNG2	-0.89997	2.8766e-05
9796	PHYHIP	-0.89925	0.0021282
10266	RAMP2	-0.89913	0.0059449
5498	PPOX	-0.89883	0.0027253
4891	SLC11A2	-0.89768	0.015302
5868	RAB5A	-0.89608	0.04662
79758	DHRS12	-0.89567	0.0023766
10140	TOB1	-0.8947	4.5475e-07
7102	TSPAN7	-0.89469	2.0344e-06
1356	CP	-0.89421	0.0029658
7105	TSPAN6	-0.89268	7.1744e-05
5064	PALM	-0.89238	0.0013106
22998	LIMCH1	-0.89159	5.486e-07
7538	ZFP36	-0.8912	0.0031798
283298	OLFML1	-0.88934	0.0025224
6640	SNTA1	-0.88904	0.00073476
10218	ANGPTL7	-0.8882	4.0718e-06
6194	RPS6	-0.88801	0.0074379
11188	NISCH	-0.88763	0.0046805
730	C7	-0.88736	0.037227
10493	VAT1	-0.88643	0.0040994
51099	ABHD5	-0.88642	2.0656e-05
6228	RPS23	-0.88602	5.6797e-07
2701	GJA4	-0.88554	0.00017565
10749	KIF1C	-0.88488	1.6381e-05
23253	ANKRD12	-0.88481	6.5847e-07
8228	PNPLA4	-0.88395	6.8538e-07
8406	SRPX	-0.88373	0.00030345
8495	PPFIBP2	-0.88338	0.00027077
9353	SLIT2	-0.88293	0.019037
27303	RBMS3	-0.88073	0.031531
1340	COX6B1	-0.88054	0.0071389
8724	SNX3	-0.8798	0.046598
9223	MAGI1	-0.87903	0.0083927
22878	TRAPPC8	-0.87836	0.0013702
8789	FBP2	-0.8783	0.0023985
5740	PTGIS	-0.87804	7.6851e-07
2064	ERBB2	-0.87759	0.0019165
23038	WDTC1	-0.87728	0.0047055
10542	HBXIP	-0.87717	0.00060366
23107	MRPS27	-0.87509	8.1719e-07
7033	TFF3	-0.8749	0.006288
3268	AGFG2	-0.87367	8.0269e-07
3476	IGBP1	-0.87365	8.2216e-07
23136	EPB41L3	-0.87347	8.3695e-07
8417	STX7	-0.87315	0.0030058
4919	ROR1	-0.87269	0.00016014
5635	PRPSAP1	-0.86911	0.0047002
1998	ELF2	-0.86892	0.026303
2328	FMO3	-0.8676	0.010505
10014	HDAC5	-0.86692	1.096e-06
10314	LANCL1	-0.86687	0.0024932
5156	PDGFRA	-0.86673	0.025689
653483	MLLT4-AS1	-0.86618	0.018782
30	ACAA1	-0.86585	0.045024
140465	MYL6B	-0.86571	0.038549
5506	PPP1R3A	-0.86472	0.045327
5980	REV3L	-0.86471	0.018299
33	ACADL	-0.86342	0.00043448
8452	CUL3	-0.86291	0.031261
5320	PLA2G2A	-0.86225	0.04347
8538	BARX2	-0.86157	0.0086265
10120	ACTR1B	-0.86054	1.194e-06
9552	SPAG7	-0.86042	0.00017612
2622	GAS8	-0.86038	2.6808e-05
2247	FGF2	-0.8602	0.020391
2998	GYS2	-0.85928	0.0001426
6821	SUOX	-0.85903	0.0085335
4709	NDUFB3	-0.85844	2.1529e-05
26137	ZBTB20	-0.85794	0.0039501
521	ATP5I	-0.85637	0.021126
10611	PDLIM5	-0.85559	0.0020994
11193	WBP4	-0.85456	0.031261
7594	ZNF43	-0.85436	0.0025068
51704	GPRC5B	-0.85282	0.01322
7136	TNNI2	-0.85261	0.014076
23164	MPRIP	-0.85255	0.00018821
7373	COL14A1	-0.85138	0.00041011
219654	ZCCHC24	-0.85111	0.00013431
7512	XPNPEP2	-0.85109	0.032694
7060	THBS4	-0.8505	2.4951e-05
27243	CHMP2A	-0.8505	0.0013781
9172	MYOM2	-0.84885	0.0021446
5292	PIM1	-0.84689	0.016964
10875	FGL2	-0.84684	0.010518
1729	DIAPH1	-0.84537	0.00050325
5187	PER1	-0.84535	0.0077555
1027	CDKN1B	-0.84445	2.0344e-06
27121	DKK4	-0.84405	2.0344e-06
9044	BTAF1	-0.8439	0.034841
83700	JAM3	-0.84333	0.00087638
8239	USP9X	-0.84318	1.8706e-06
2059	EPS8	-0.8423	0.00061627
50855	PARD6A	-0.84195	3.4617e-06
55786	ZNF415	-0.84163	0.027256
7306	TYRP1	-0.84108	0.0076153
25891	PAMR1	-0.84071	0.00063034
6095	RORA	-0.84021	0.030052
56255	TMX4	-0.83997	2.3049e-06
5157	PDGFRL	-0.8387	0.004744
374291	NDUFS7	-0.8384	0.0035987
2647	BLOC1S1	-0.83815	9.6615e-05
8611	PPAP2A	-0.83764	0.0014373
8604	SLC25A12	-0.83728	0.0068295
26959	HBP1	-0.83539	0.00048958
64112	MOAP1	-0.83458	0.00044772
10924	SMPDL3A	-0.8344	0.0095123
22902	RUFY3	-0.83359	0.02357
6208	RPS14	-0.8334	2.7504e-06
25961	NUDT13	-0.83264	2.6823e-06
1428	CRYM	-0.83127	0.015664
157922	CAMSAP1	-0.83125	0.017739
22934	RPIA	-0.83115	2.7871e-06
9520	NPEPPS	-0.83071	0.0081239
10217	CTDSPL	-0.82711	0.00068977
9380	GRHPR	-0.82703	3.2481e-06
125144	C17orf76-AS1	-0.82647	0.024519
9905	SGSM2	-0.82602	0.0021431
6137	RPL13	-0.82531	0.03317
3547	IGSF1	-0.82247	3.8077e-06
8554	PIAS1	-0.82204	3.5575e-06
7905	REEP5	-0.8215	0.00043986
4857	NOVA1	-0.82119	0.017341
1892	ECHS1	-0.81921	4.0718e-06
51090	PLLP	-0.8191	0.0057579
7881	KCNAB1	-0.81898	0.012383
9314	KLF4	-0.81743	0.012318
84263	HSDL2	-0.81663	0.0041917
2984	GUCY2C	-0.81311	0.0011462
4048	LTA4H	-0.81238	0.010076
5075	PAX1	-0.81215	0.0032582
9710	KIAA0355	-0.81033	5.1427e-06
2065	ERBB3	-0.80762	0.00068332
8543	LMO4	-0.80592	5.263e-06
1112	FOXN3	-0.80547	0.0008907
7068	THRB	-0.80489	0.036131
2052	EPHX1	-0.80392	0.0062759
5463	POU6F1	-0.80339	1.3744e-05
115201	ATG4A	-0.80257	2.1716e-05
23266	LPHN2	-0.80238	0.010225
2039	EPB49	-0.8018	0.014402
2947	GSTM3	-0.80133	3.7649e-05
2217	FCGRT	-0.80031	0.0040416
6453	ITSN1	-0.79993	0.04007
285755	PPIL6	-0.79913	0.002146
5236	PGM1	-0.79846	0.0043836
6786	STIM1	-0.79751	7.3662e-06
10209	EIF1	-0.79675	0.0030287
275	AMT	-0.7962	0.011497
364	AQP7	-0.79545	0.0038406
27109	ATP5S	-0.79368	7.9314e-06
862	RUNX1T1	-0.79288	8.845e-06
7155	TOP2B	-0.79154	9.0392e-06
9685	CLINT1	-0.78866	0.00099852
593	BCKDHA	-0.78831	0.038657
286	ANK1	-0.78705	0.017683
23194	FBXL7	-0.78685	9.7293e-06
18	ABAT	-0.78631	0.0053034
2315	MLANA	-0.78514	2.4845e-05
56948	SDR39U1	-0.78486	0.023996
2181	ACSL3	-0.78381	1.0427e-05
4209	MEF2D	-0.78354	0.029031
10559	SLC35A1	-0.78352	0.00018141
2762	GMDS	-0.78343	0.0064583
10149	GPR64	-0.78294	1.103e-05
4602	MYB	-0.78294	1.1285e-05
1979	EIF4EBP2	-0.78259	0.0060581
9853	RUSC2	-0.78109	0.00023061
1831	TSC22D3	-0.78108	0.0016324
4948	OCA2	-0.78098	0.013886
8854	ALDH1A2	-0.78049	0.0031986
51304	ZDHHC3	-0.78039	0.033034
5420	PODXL	-0.78008	0.0044544
1938	EEF2	-0.77942	1.2179e-05
9813	KIAA0494	-0.77806	1.2448e-05
201229	C17orf108	-0.77748	1.2851e-05
4081	MAB21L1	-0.7774	0.016854
23119	HIC2	-0.77717	0.0022441
1396	CRIP1	-0.77683	0.045078
55937	APOM	-0.77532	1.2492e-05
51439	FAM8A1	-0.77453	0.0079937
55816	DOK5	-0.77414	0.0061833
25864	ABHD14A	-0.77413	0.00017323
11043	MID2	-0.77387	0.0024355
9365	KL	-0.77282	0.038298
64689	GORASP1	-0.77278	8.6746e-05
2971	GTF3A	-0.7721	0.004032
8545	CGGBP1	-0.77132	0.032309
347733	TUBB2B	-0.77116	0.0482
2644	GCHFR	-0.771	1.4872e-05
5250	SLC25A3	-0.76991	0.00074499
4004	LMO1	-0.76923	0.011632
6505	SLC1A1	-0.76893	8.8574e-05
4598	MVK	-0.76829	0.01002
4680	CEACAM6	-0.76819	0.020738
51112	TRAPPC12	-0.76746	1.6983e-05
10810	WASF3	-0.76712	0.012358
5105	PCK1	-0.76489	0.032112
5376	PMP22	-0.76388	1.8209e-05
27069	GHITM	-0.76272	0.0026102
10174	SORBS3	-0.76229	0.040086
23369	PUM2	-0.76222	6.0439e-05
4212	MEIS2	-0.76008	0.0016406
23383	MAU2	-0.75908	2.3172e-05
8738	CRADD	-0.75752	0.00276
10656	KHDRBS3	-0.75736	4.8684e-05
57104	PNPLA2	-0.75685	2.1653e-05
1351	COX8A	-0.75663	7.5066e-05
8839	WISP2	-0.75637	0.0024009
10486	CAP2	-0.75555	0.014628
2788	GNG7	-0.7549	0.032993
5019	OXCT1	-0.75396	0.047623
9553	MRPL33	-0.75358	0.0037113
5649	RELN	-0.75238	0.043771
23024	PDZRN3	-0.75145	0.00067186
779	CACNA1S	-0.75044	0.040231
8531	CSDA	-0.74801	0.0010968
1843	DUSP1	-0.74647	0.00028304
3882	KRT32	-0.74641	2.825e-05
23456	ABCB10	-0.74458	0.025203
10659	CELF2	-0.74398	0.0093238
2202	EFEMP1	-0.74378	3.0641e-05
57209	ZNF248	-0.74304	0.0038406
6563	SLC14A1	-0.74291	0.023973
4601	MXI1	-0.74269	0.0015354
1737	DLAT	-0.74236	0.012118
10411	RAPGEF3	-0.74174	0.0010968
23061	TBC1D9B	-0.74127	0.020255
23392	KIAA0368	-0.73981	0.0030839
5774	PTPN3	-0.73927	6.6116e-05
4046	LSP1	-0.73926	0.0037096
51103	NDUFAF1	-0.7391	0.00010448
11076	TPPP	-0.73873	3.2975e-05
3551	IKBKB	-0.73791	0.0008112
54463	FAM134B	-0.73779	0.011497
23111	SPG20	-0.73751	0.033034
1950	EGF	-0.73597	0.040814
10099	TSPAN3	-0.73056	0.038707
1471	CST3	-0.7303	4.3848e-05
3382	ICA1	-0.72957	4.3088e-05
4958	OMD	-0.72797	4.5972e-05
6414	SEPP1	-0.72715	0.0015584
7923	HSD17B8	-0.72594	0.0056999
1583	CYP11A1	-0.72447	0.025282
6403	SELP	-0.72366	0.027303
3993	LLGL2	-0.72347	0.013471
2888	GRB14	-0.7218	0.00098519
23315	SLC9A8	-0.72031	0.0046406
845	CASQ2	-0.71953	0.021333
1102	RCBTB2	-0.71937	0.016378
3483	IGFALS	-0.71898	0.021622
6844	VAMP2	-0.7167	0.0089815
66036	MTMR9	-0.71542	5.9793e-05
25874	BRP44	-0.71537	0.00083133
115	ADCY9	-0.71425	6.162e-05
7100	TLR5	-0.7141	0.00081197
5253	PHF2	-0.71294	6.5413e-05
7048	TGFBR2	-0.71197	0.011203
10180	RBM6	-0.71006	0.000156
6297	SALL2	-0.70965	0.0008112
4292	MLH1	-0.70963	0.0036557
1735	DIO3	-0.70895	0.047445
7299	TYR	-0.70891	7.453e-05
27235	COQ2	-0.70846	0.00018389
10391	CORO2B	-0.707	0.013697
5116	PCNT	-0.70675	0.00035777
11138	TBC1D8	-0.70658	7.675e-05
54870	QRICH1	-0.70572	0.0025084
3479	IGF1	-0.70499	0.0069477
1557	CYP2C19	-0.70357	0.0037837
509	ATP5C1	-0.70319	0.02714
5825	ABCD3	-0.70305	0.0010511
66008	TRAK2	-0.7029	8.0302e-05
515	ATP5F1	-0.70261	0.0034023
3679	ITGA7	-0.70257	0.0068924
9865	TRIL	-0.70255	7.8446e-05
43	ACHE	-0.70154	0.0092026
594	BCKDHB	-0.70091	0.0027354
84159	ARID5B	-0.69806	0.036151
6451	SH3BGRL	-0.69569	0.036322
5501	PPP1CC	-0.6932	0.0001016
8742	TNFSF12	-0.69233	0.00010345
9863	MAGI2	-0.69214	0.0065248
2778	GNAS	-0.69166	0.048102
6777	STAT5B	-0.69092	0.00011158
1366	CLDN7	-0.69046	0.0015069
1047	CLGN	-0.68889	0.011547
51780	KDM3B	-0.68888	0.00011056
10268	RAMP3	-0.68888	0.012506
2309	FOXO3	-0.68863	0.0042599
3550	IK	-0.68761	0.019549
4719	NDUFS1	-0.68708	0.00011287
23464	GCAT	-0.68697	0.0076243
3572	IL6ST	-0.68685	0.00027472
7639	ZNF85	-0.68678	0.0067181
516	ATP5G1	-0.68667	0.04047
26227	PHGDH	-0.68599	0.015891
5357	PLS1	-0.68428	0.017479
23335	WDR7	-0.68391	0.0002933
5903	RANBP2	-0.6816	0.034976
1955	MEGF9	-0.68155	0.044373
23122	CLASP2	-0.68151	0.035484
5563	PRKAA2	-0.68005	0.003028
6601	SMARCC2	-0.67956	0.00013688
9920	KBTBD11	-0.67811	0.0054226
5813	PURA	-0.67695	0.00015203
3884	KRT33B	-0.6766	0.028546
5860	QDPR	-0.67538	0.039192
5018	OXA1L	-0.67497	0.021652
55885	LMO3	-0.67418	0.0082189
9879	DDX46	-0.67069	0.0083871
2222	FDFT1	-0.67005	0.00018465
5532	PPP3CB	-0.67002	0.0027253
23230	VPS13A	-0.66917	0.021297
23235	SIK2	-0.66895	0.00019236
4776	NFATC4	-0.66845	0.031928
9575	CLOCK	-0.66474	0.0016446
9759	HDAC4	-0.66409	0.00064528
139322	APOOL	-0.66347	0.001467
7067	THRA	-0.66278	0.0064739
4722	NDUFS3	-0.66112	0.0014924
6727	SRP14	-0.6604	0.00022043
78987	CRELD1	-0.66035	0.037932
115286	SLC25A26	-0.65985	0.020502
10463	SLC30A9	-0.65888	0.00023147
518	ATP5G3	-0.65758	0.02319
9349	RPL23	-0.65657	0.00024601
56288	PARD3	-0.65632	0.00025516
4942	OAT	-0.65572	0.023973
79987	SVEP1	-0.65455	0.038335
23248	RPRD2	-0.65439	0.0038713
3759	KCNJ2	-0.65428	0.04153
11258	DCTN3	-0.65301	0.00027095
27295	PDLIM3	-0.65177	0.039594
482	ATP1B2	-0.65135	0.00027128
57515	SERINC1	-0.65122	0.00028475
80344	DCAF11	-0.65046	0.021784
55503	TRPV6	-0.6496	0.01971
9252	RPS6KA5	-0.64928	0.011037
3305	HSPA1L	-0.64909	0.00030015
3745	KCNB1	-0.64699	0.00032062
1101	CHAD	-0.64448	0.031879
6584	SLC22A5	-0.64438	0.03374
7384	UQCRC1	-0.64437	0.039191
9590	AKAP12	-0.64392	0.00057823
23051	ZHX3	-0.64377	0.00033243
4856	NOV	-0.64338	0.026073
1003	CDH5	-0.64195	0.023933
2122	MECOM	-0.64037	0.00074721
10957	PNRC1	-0.6399	0.030339
1842	ECM2	-0.63903	0.017111
10755	GIPC1	-0.63902	0.000375
5423	POLB	-0.63883	0.00044951
4128	MAOA	-0.63868	0.0069858
9528	TMEM59	-0.63844	0.019334
6663	SOX10	-0.63787	0.00037437
1215	CMA1	-0.6364	0.032058
5533	PPP3CC	-0.63616	0.001139
7098	TLR3	-0.63526	0.0012145
4713	NDUFB7	-0.63521	0.00041368
5244	ABCB4	-0.6325	0.00043448
130916	MTERFD2	-0.63181	0.00041794
29969	MDFIC	-0.63045	0.017613
2109	ETFB	-0.63037	0.00045689
3991	LIPE	-0.62698	0.00049798
23443	SLC35A3	-0.62598	0.00049253
11326	VSIG4	-0.62556	0.00050136
7220	TRPC1	-0.62442	0.014628
9306	SOCS6	-0.62284	0.010463
7994	KAT6A	-0.62239	0.028989
4215	MAP3K3	-0.62141	0.024254
7763	ZFAND5	-0.62109	0.016203
3280	HES1	-0.62002	0.019689
25875	LETMD1	-0.61974	0.0018756
4147	MATN2	-0.61697	0.022408
7164	TPD52L1	-0.61543	0.00063034
8659	ALDH4A1	-0.61519	0.00062339
6094	ROM1	-0.61465	0.0008907
6490	PMEL	-0.61367	0.023544
23053	KIAA0913	-0.6104	0.037841
8484	GALR3	-0.61024	0.033498
5797	PTPRM	-0.60864	0.00091797
8817	FGF18	-0.60681	0.00078398
54665	RSBN1	-0.60643	0.00077137
4820	NKTR	-0.60573	0.01796
4862	NPAS2	-0.60545	0.00078549
9352	TXNL1	-0.60499	0.038305
842	CASP9	-0.60473	0.00079648
10869	USP19	-0.60392	0.0007952
23390	ZDHHC17	-0.60382	0.00079203
1014	CDH16	-0.60325	0.010285
1363	CPE	-0.6032	0.012383
9099	USP2	-0.60167	0.00084718
9987	HNRPDL	-0.60139	0.0062759
26092	TOR1AIP1	-0.60118	0.00087277
4155	MBP	-0.59987	0.030887
26040	SETBP1	-0.59896	0.010028
770	CA11	-0.59832	0.023191
9922	IQSEC1	-0.59734	0.021963
1638	DCT	-0.597	0.014136
23138	N4BP3	-0.59685	0.00092409
4905	NSF	-0.59598	0.029263
65110	UPF3A	-0.59564	0.01683
10289	EIF1B	-0.59459	0.0043178
23116	FAM179B	-0.59435	0.00098549
1795	DOCK3	-0.59318	0.0010207
1908	EDN3	-0.59267	0.0027253
9071	CLDN10	-0.58974	0.0027253
1545	CYP1B1	-0.5894	0.0010799
288	ANK3	-0.58891	0.027598
8537	BCAS1	-0.58866	0.0019031
10240	MRPS31	-0.58857	0.0095536
168544	ZNF467	-0.58776	0.0011698
22847	ZNF507	-0.58749	0.013059
6405	SEMA3F	-0.58741	0.0011652
6302	TSPAN31	-0.58618	0.0012047
5372	PMM1	-0.58577	0.024956
6647	SOD1	-0.58536	0.030253
517	ATP5G2	-0.58407	0.0066541
23498	HAAO	-0.58191	0.028139
22899	ARHGEF15	-0.58167	0.021386
5170	PDPK1	-0.5814	0.0055187
5409	PNMT	-0.57768	0.03517
4675	NAP1L3	-0.57673	0.004283
2138	EYA1	-0.57621	0.021078
10294	DNAJA2	-0.57571	0.0038473
11238	CA5B	-0.57559	0.0034549
57037	ANKMY2	-0.57553	0.023933
65055	REEP1	-0.57424	0.021305
1632	ECI1	-0.57383	0.0052752
4359	MPZ	-0.57344	0.012029
51257	MARCH2	-0.57333	0.0015276
23353	SUN1	-0.57313	0.0014831
84909	C9orf3	-0.57223	0.049116
23705	CADM1	-0.57194	0.0015862
8050	PDHX	-0.57193	0.024632
2517	FUCA1	-0.56976	0.0016142
25813	SAMM50	-0.56762	0.017551
9512	PMPCB	-0.56631	0.018126
2874	GPS2	-0.56617	0.039191
9254	CACNA2D2	-0.56596	0.024613
10983	CCNI	-0.56453	0.0018228
686	BTD	-0.56447	0.0018783
51066	C3orf32	-0.56326	0.0018821
10020	GNE	-0.5618	0.0019429
6484	ST3GAL4	-0.56155	0.0019824
5093	PCBP1	-0.55827	0.003151
79868	ALG13	-0.55575	0.0021296
2908	NR3C1	-0.55448	0.016563
3849	KRT2	-0.55292	0.01601
4692	NDN	-0.55285	0.018381
7696	ZNF137P	-0.55258	0.0023284
57146	TMEM159	-0.55239	0.0061048
6605	SMARCE1	-0.55162	0.0024525
6296	ACSM3	-0.55106	0.023386
5396	PRRX1	-0.55006	0.010171
1666	DECR1	-0.54995	0.0024098
5255	PHKA1	-0.54935	0.0025045
27245	AHDC1	-0.54893	0.0025068
4014	LOR	-0.54827	0.0025552
1465	CSRP1	-0.54821	0.0026424
23037	PDZD2	-0.54797	0.0084193
26140	TTLL3	-0.54795	0.0031278
6205	RPS11	-0.54768	0.0099193
26018	LRIG1	-0.54491	0.0080248
5311	PKD2	-0.54443	0.017828
9857	CEP350	-0.54409	0.0069723
94	ACVRL1	-0.54295	0.015788
54462	FAM190B	-0.54125	0.002946
3929	LBP	-0.54101	0.0048981
6432	SRSF7	-0.54039	0.0030402
22905	EPN2	-0.54011	0.011632
2271	FH	-0.53776	0.0030839
5126	PCSK2	-0.53765	0.003099
221443	C6orf130	-0.53747	0.0030839
8443	GNPAT	-0.53627	0.0031389
11017	SNRNP27	-0.53574	0.0031721
8874	ARHGEF7	-0.53508	0.0037636
7439	BEST1	-0.53444	0.0032195
27258	LSM3	-0.53437	0.013695
3880	KRT19	-0.53249	0.0034495
1407	CRY1	-0.53209	0.0035023
29799	YPEL1	-0.53104	0.0046274
10594	PRPF8	-0.5305	0.036664
9724	UTP14C	-0.52988	0.0036164
7465	WEE1	-0.5281	0.0038406
8848	TSC22D1	-0.52792	0.0038473
22907	DHX30	-0.52757	0.021811
3841	KPNA5	-0.52685	0.0038836
7077	TIMP2	-0.52636	0.007863
23360	FNBP4	-0.5262	0.0083361
54874	FNBP1L	-0.52536	0.022408
8654	PDE5A	-0.52393	0.024042
51592	TRIM33	-0.52388	0.0088686
50	ACO2	-0.52305	0.0041808
7802	DNALI1	-0.52291	0.049088
5961	PRPH2	-0.52225	0.0088635
4677	NARS	-0.52223	0.0041317
64743	WDR13	-0.51997	0.0043033
2199	FBLN2	-0.51878	0.013985
267	AMFR	-0.5181	0.004454
3337	DNAJB1	-0.51429	0.0048113
8997	KALRN	-0.51419	0.0047305
3422	IDI1	-0.51415	0.0046978
1605	DAG1	-0.51394	0.010069
22918	CD93	-0.5139	0.0094806
64854	USP46	-0.51323	0.0048981
1004	CDH6	-0.51197	0.0094569
58473	PLEKHB1	-0.51178	0.005159
23308	ICOSLG	-0.51139	0.005123
10647	SCGB1D2	-0.51036	0.0065687
6006	RHCE	-0.50983	0.0053325
8499	PPFIA2	-0.50978	0.0050915
6397	SEC14L1	-0.50917	0.013695
5016	OVGP1	-0.50903	0.0053034
57212	TP73-AS1	-0.50805	0.0054226
25956	SEC31B	-0.50754	0.0054367
374868	ATP9B	-0.50699	0.028989
23741	EID1	-0.50676	0.038549
55251	PCMTD2	-0.50646	0.0056999
9774	BCLAF1	-0.50614	0.026865
25828	TXN2	-0.50586	0.00576
774	CACNA1B	-0.50549	0.020584
5926	ARID4A	-0.50423	0.0059658
3727	JUND	-0.50084	0.044593
10389	SCML2	-0.50058	0.0099688
9358	ITGBL1	-0.49828	0.024042
2549	GAB1	-0.49715	0.0067139
89944	GLB1L2	-0.49673	0.045498
325	APCS	-0.49403	0.0068605
6444	SGCD	-0.49238	0.023456
53358	SHC3	-0.49209	0.0071222
51196	PLCE1	-0.49143	0.0072257
6169	RPL38	-0.49142	0.0074379
4878	NPPA	-0.4904	0.022636
51308	REEP2	-0.48963	0.025689
81621	KAZALD1	-0.48913	0.0076137
4921	DDR2	-0.4883	0.0077526
80208	SPG11	-0.48681	0.022408
22841	RAB11FIP2	-0.48664	0.0081342
4617	MYF5	-0.48629	0.032146
2621	GAS6	-0.48581	0.008105
51100	SH3GLB1	-0.48516	0.024834
2646	GCKR	-0.48355	0.027561
5199	CFP	-0.48306	0.0099193
7556	ZNF10	-0.48276	0.008406
4835	NQO2	-0.48118	0.0088686
6168	RPL37A	-0.4801	0.009148
6534	SLC6A7	-0.47843	0.018248
5145	PDE6A	-0.47715	0.029829
7799	PRDM2	-0.47712	0.0094448
91746	YTHDC1	-0.47678	0.0092719
7874	USP7	-0.47671	0.031108
4354	MPP1	-0.47519	0.0098087
2070	EYA4	-0.4736	0.010195
29903	CCDC106	-0.47324	0.01007
5322	PLA2G5	-0.47317	0.0099597
6150	MRPL23	-0.47255	0.01027
4245	MGAT1	-0.47094	0.041839
4047	LSS	-0.46968	0.010748
5310	PKD1	-0.46939	0.010878
6817	SULT1A1	-0.4682	0.011236
3549	IHH	-0.46794	0.011269
2134	EXTL1	-0.467	0.011277
1738	DLD	-0.46699	0.046447
10482	NXF1	-0.46653	0.025969
3818	KLKB1	-0.46577	0.011547
361	AQP4	-0.46432	0.02539
830	CAPZA2	-0.46297	0.01203
10456	HAX1	-0.4627	0.012354
4640	MYO1A	-0.46263	0.011909
22844	FRMPD1	-0.46229	0.012417
23185	LARP4B	-0.46216	0.012213
5510	PPP1R7	-0.46206	0.015025
7582	ZNF33B	-0.46119	0.012347
6622	SNCA	-0.46022	0.012668
51035	UBXN1	-0.45861	0.012676
1543	CYP1A1	-0.45851	0.016183
10899	JTB	-0.4585	0.033674
2098	ESD	-0.45739	0.013264
4673	NAP1L1	-0.45466	0.038796
3792	KEL	-0.45393	0.020887
26035	GLCE	-0.45291	0.014402
23645	PPP1R15A	-0.45277	0.014402
246	ALOX15	-0.45195	0.014655
8646	CHRD	-0.44928	0.022828
2308	FOXO1	-0.44687	0.015893
2350	FOLR2	-0.44658	0.016003
9943	OXSR1	-0.44391	0.04519
23239	PHLPP1	-0.44247	0.028058
3791	KDR	-0.44167	0.01757
2631	GBAS	-0.43989	0.027598
5900	RALGDS	-0.43857	0.017882
23170	TTLL12	-0.43847	0.018283
9364	RAB28	-0.43836	0.018528
220	ALDH1A3	-0.43824	0.018253
6833	ABCC8	-0.43645	0.045024
51020	HDDC2	-0.43529	0.023544
8929	PHOX2B	-0.43461	0.047393
8751	ADAM15	-0.43359	0.019968
64405	CDH22	-0.43252	0.020258
22852	ANKRD26	-0.43204	0.019893
9957	HS3ST1	-0.43068	0.028631
7021	TFAP2B	-0.42995	0.024404
2905	GRIN2C	-0.4293	0.037011
7322	UBE2D2	-0.42392	0.02327
1944	EFNA3	-0.4228	0.023238
2042	EPHA3	-0.42088	0.024042
416	ARSF	-0.42079	0.023729
26135	SERBP1	-0.42014	0.024156
84851	TRIM52	-0.41776	0.02512
57151	LYZL6	-0.41722	0.025179
40	ASIC2	-0.41697	0.026073
10043	TOM1	-0.41598	0.03554
785	CACNB4	-0.41545	0.026073
90355	C5orf30	-0.41464	0.026711
28954	REM1	-0.41454	0.026551
80205	CHD9	-0.41411	0.026701
7031	TFF1	-0.41134	0.028108
5443	POMC	-0.41131	0.027303
140890	SREK1	-0.41121	0.027856
5916	RARG	-0.41094	0.029079
478	ATP1A3	-0.41038	0.028253
9429	ABCG2	-0.40727	0.029721
4255	MGMT	-0.40682	0.030032
1589	CYP21A2	-0.40626	0.029944
677	ZFP36L1	-0.4053	0.030732
55023	PHIP	-0.40275	0.031261
538	ATP7A	-0.40216	0.032058
50804	MYEF2	-0.40202	0.042752
129080	EMID1	-0.40181	0.031621
3026	HABP2	-0.39634	0.043447
4712	NDUFB6	-0.39328	0.036988
140462	ASB9	-0.39277	0.036663
405	ARNT	-0.39271	0.037439
9577	BRE	-0.39235	0.036781
57060	PCBP4	-0.39171	0.037435
5906	RAP1A	-0.39012	0.038313
2869	GRK5	-0.39005	0.038328
10693	CCT6B	-0.38945	0.038581
6938	TCF12	-0.38512	0.040564
9356	SLC22A6	-0.38339	0.042715
6988	TCTA	-0.38316	0.042195
7431	VIM	-0.38272	0.042545
51669	TMEM66	-0.38272	0.043022
10668	CGRRF1	-0.38189	0.043474
1060	CENPC1	-0.38179	0.043367
1775	DNASE1L2	-0.38137	0.043527
546	ATRX	-0.38011	0.044852
1031	CDKN2C	-0.37953	0.04468
6753	SSTR3	-0.37921	0.045005
26013	L3MBTL1	-0.37899	0.044676
2323	FLT3LG	-0.37699	0.046044
1602	DACH1	-0.37568	0.047787
617	BCS1L	-0.37499	0.047921
7006	TEC	-0.37377	0.048589
11214	AKAP13	-0.37292	0.048861
23001	WDFY3	-0.37153	0.049917
4790	NFKB1	0.37165	0.049621
3257	HPS1	0.3725	0.049676
1138	CHRNA5	0.37279	0.049352
23161	SNX13	0.3734	0.048887
3981	LIG4	0.37409	0.04866
84720	PIGO	0.37796	0.045868
10574	CCT7	0.37926	0.045078
3267	AGFG1	0.38062	0.043527
27072	VPS41	0.38299	0.042488
23595	ORC3	0.38437	0.042045
9657	IQCB1	0.3858	0.040851
80742	PRR3	0.38666	0.039802
2281	FKBP1B	0.38713	0.039656
6695	SPOCK1	0.38747	0.039664
6789	STK4	0.38914	0.038995
81553	FAM49A	0.38931	0.039401
8412	BCAR3	0.38958	0.039224
5729	PTGDR	0.39003	0.042045
2020	EN2	0.39128	0.037534
4795	NFKBIL1	0.3929	0.036406
22826	DNAJC8	0.39964	0.032885
63036	CELA2A	0.40029	0.032885
6746	SSR2	0.40064	0.032694
8690	JRKL	0.4041	0.030514
10921	RNPS1	0.40487	0.03094
7019	TFAM	0.40495	0.030319
5794	PTPRH	0.40505	0.030192
4821	NKX2-2	0.40635	0.030131
9375	TM9SF2	0.40674	0.029268
6579	SLCO1A2	0.40948	0.028579
3336	HSPE1	0.4098	0.02818
23532	PRAME	0.4114	0.027598
5641	LGMN	0.41377	0.026303
595	CCND1	0.41604	0.025775
57834	CYP4F11	0.41779	0.025208
54520	CCDC93	0.41835	0.027143
8315	BRAP	0.41867	0.024376
7597	ZBTB25	0.41983	0.024111
4248	MGAT3	0.42015	0.024254
8600	TNFSF11	0.42032	0.024008
2892	GRIA3	0.42148	0.023582
10799	RPP40	0.42385	0.034091
22995	CEP152	0.42559	0.022726
5110	PCMT1	0.42617	0.021836
1292	COL6A2	0.42746	0.021736
331	XIAP	0.42925	0.027856
4481	MSR1	0.42997	0.020738
3716	JAK1	0.43011	0.020479
5557	PRIM1	0.43018	0.041269
80143	SIKE1	0.43127	0.020255
9722	NOS1AP	0.43257	0.019734
8677	STX10	0.43276	0.024427
2196	FAT2	0.43287	0.034558
1802	DPH2	0.43385	0.019163
6880	TAF9	0.43423	0.042331
5155	PDGFB	0.43493	0.033618
9360	PPIG	0.43541	0.019032
8727	CTNNAL1	0.43577	0.019089
22873	DZIP1	0.43666	0.018648
2014	EMP3	0.43744	0.018237
174	AFP	0.4382	0.018237
6884	TAF13	0.4384	0.018283
3842	TNPO1	0.43855	0.017973
23130	ATG2A	0.44154	0.017033
10856	RUVBL2	0.44244	0.01683
10519	CIB1	0.44296	0.017096
6760	SS18	0.44425	0.027362
6310	ATXN1	0.44716	0.015584
55589	BMP2K	0.44949	0.014881
8745	ADAM23	0.44949	0.023729
3801	KIFC3	0.45033	0.015208
23344	ESYT1	0.45147	0.014727
57819	LSM2	0.45271	0.014305
126208	ZNF787	0.45347	0.023662
271	AMPD2	0.45473	0.025475
8869	ST3GAL5	0.45538	0.013961
8729	GBF1	0.45819	0.012795
2906	GRIN2D	0.4589	0.012943
11342	RNF13	0.46212	0.012382
26118	WSB1	0.46218	0.012359
9941	EXOG	0.46328	0.012218
1457	CSNK2A1	0.46354	0.012218
8732	RNGTT	0.46521	0.011473
3895	KTN1	0.46643	0.044231
23640	HSPBP1	0.46672	0.011166
4869	NPM1	0.46708	0.011157
1983	EIF5	0.46842	0.010914
23761	PISD	0.47122	0.010555
7978	MTERF	0.47124	0.010534
5163	PDK1	0.47172	0.049501
2152	F3	0.47235	0.033335
4507	MTAP	0.47264	0.010073
7486	WRN	0.47401	0.010076
23093	TTLL5	0.47589	0.028171
10920	COPS8	0.47619	0.0095251
5336	PLCG2	0.4762	0.042045
5316	PKNOX1	0.47779	0.0093692
8178	ELL	0.47872	0.0090968
6741	SSB	0.47918	0.0091749
26133	TRPC4AP	0.47923	0.0091554
8892	EIF2B2	0.48015	0.030794
9497	SLC4A7	0.48026	0.0091272
5335	PLCG1	0.48054	0.0090817
22981	NINL	0.48092	0.021071
2625	GATA3	0.48251	0.0085691
4534	MTM1	0.48264	0.02152
5702	PSMC3	0.48281	0.0086435
5195	PEX14	0.4831	0.01151
10908	PNPLA6	0.48397	0.014575
8675	STX16	0.48643	0.016062
22876	INPP5F	0.48691	0.025126
10525	HYOU1	0.48694	0.038298
10105	PPIF	0.48957	0.011434
7087	ICAM5	0.48958	0.0074007
8720	MBTPS1	0.49027	0.0074669
22797	TFEC	0.49169	0.0072464
8672	EIF4G3	0.49196	0.0071154
4170	MCL1	0.49227	0.025678
10432	RBM14	0.49292	0.0070522
4016	LOXL1	0.49312	0.028088
221749	PXDC1	0.49402	0.006919
171017	ZNF384	0.4941	0.0070603
5611	DNAJC3	0.49455	0.036928
10471	PFDN6	0.49522	0.031161
5128	CDK17	0.49633	0.0067881
5349	FXYD3	0.49679	0.01938
2015	EMR1	0.497	0.0067148
11057	ABHD2	0.49821	0.0066915
10247	HRSP12	0.49868	0.0064453
9229	DLGAP1	0.49947	0.006288
8408	ULK1	0.5	0.047393
253943	YTHDF3	0.50025	0.025347
821	CANX	0.50045	0.0063354
9146	HGS	0.50103	0.0060581
1455	CSNK1G2	0.50122	0.0076129
253982	ASPHD1	0.50196	0.006122
7738	ZNF184	0.5023	0.0059059
51567	TDP2	0.50263	0.017268
10139	ARFRP1	0.50329	0.029097
22868	FASTKD2	0.50361	0.0058856
7517	XRCC3	0.5038	0.0058856
9589	WTAP	0.50488	0.0056128
334	APLP2	0.50597	0.0055263
6046	BRD2	0.50655	0.0056167
56829	ZC3HAV1	0.50761	0.035635
6059	ABCE1	0.50825	0.0054029
1846	DUSP4	0.50874	0.0054367
7511	XPNPEP1	0.50952	0.0054367
9682	KDM4A	0.51033	0.02622
5562	PRKAA1	0.51077	0.0052211
5817	PVR	0.51103	0.005159
1523	CUX1	0.51353	0.020624
8260	NAA10	0.51365	0.0047305
25844	YIPF3	0.51571	0.011046
6522	SLC4A2	0.51627	0.0045132
4103	MAGEA4	0.51725	0.0044307
387032	ZKSCAN4	0.51741	0.0044729
9673	SLC25A44	0.51867	0.0043502
9703	KIAA0100	0.52134	0.0041626
23082	PPRC1	0.52138	0.0073878
2026	ENO2	0.52163	0.0043178
3980	LIG3	0.52185	0.0043033
9175	MAP3K13	0.52195	0.0041041
6835	SURF2	0.5225	0.0041712
3092	HIP1	0.52315	0.0041051
22938	SNW1	0.52339	0.0040014
23312	DMXL2	0.52371	0.020008
490	ATP2B1	0.5239	0.0039684
1240	CMKLR1	0.52463	0.027393
3213	HOXB3	0.52479	0.0040452
8317	CDC7	0.52541	0.032519
7461	CLIP2	0.52708	0.0038854
4109	MAGEA10	0.52745	0.0037566
10665	C6orf10	0.52921	0.029829
1535	CYBA	0.53003	0.020497
8733	GPAA1	0.5314	0.0034728
11118	BTN3A2	0.53419	0.045678
11127	KIF3A	0.53495	0.0031988
26099	C1orf144	0.53504	0.013199
4739	NEDD9	0.53534	0.048994
3799	KIF5B	0.53679	0.0031176
8900	CCNA1	0.53751	0.0031322
10772	SRSF10	0.53848	0.0030764
1398	CRK	0.5385	0.0031076
329	BIRC2	0.53885	0.0044171
55972	SLC25A40	0.53935	0.003078
10421	CD2BP2	0.53962	0.0030839
9785	DHX38	0.53967	0.010164
55905	RNF114	0.53976	0.0029247
8838	WISP3	0.54005	0.0030214
3145	HMBS	0.54054	0.0030058
51176	LEF1	0.54153	0.0029637
26608	TBL2	0.5421	0.020034
4110	MAGEA11	0.5436	0.0026995
9541	CIR1	0.54495	0.0026961
2783	GNB2	0.54506	0.023263
7707	ZNF148	0.54905	0.0025126
10695	CNPY3	0.54923	0.014402
3202	HOXA5	0.54984	0.018047
113251	LARP4	0.55047	0.0024101
5932	RBBP8	0.55075	0.0024657
25827	FBXL2	0.55555	0.042225
9690	UBE3C	0.55738	0.0021281
7444	VRK2	0.55775	0.0020994
149111	CNIH3	0.55814	0.021978
3714	JAG2	0.55905	0.0021036
81605	URM1	0.55914	0.020411
3190	HNRNPK	0.55925	0.0056243
9898	UBAP2L	0.56059	0.0020299
51678	MPP6	0.5606	0.0020264
5724	PTAFR	0.56097	0.0054367
23658	LSM5	0.5612	0.0019967
8697	CDC23	0.56144	0.0018975
5198	PFAS	0.56165	0.021791
4363	ABCC1	0.56238	0.0068295
165	AEBP1	0.56301	0.012795
5550	PREP	0.56324	0.0089815
3235	HOXD9	0.56338	0.026888
10146	G3BP1	0.5636	0.035042
9158	FIBP	0.56393	0.023626
55658	RNF126	0.56566	0.023809
58504	ARHGAP22	0.56628	0.0017414
10428	CFDP1	0.56664	0.0018178
6871	TADA2A	0.56756	0.0017052
2120	ETV6	0.56759	0.031305
929	CD14	0.57048	0.010123
57418	WDR18	0.57099	0.0015613
10541	ANP32B	0.57194	0.005441
3661	IRF3	0.572	0.0015772
10672	GNA13	0.57322	0.0024932
6781	STC1	0.57431	0.0044411
10598	AHSA1	0.57432	0.0091996
23355	VPS8	0.57455	0.00152
163	AP2B1	0.57463	0.0099914
22928	SEPHS2	0.575	0.010624
9473	C1orf38	0.57515	0.0015256
430	ASCL2	0.57611	0.019971
3376	IARS	0.57632	0.0014642
4502	MT2A	0.57744	0.0014235
11237	RNF24	0.57793	0.0014299
8774	NAPG	0.57814	0.0013884
5709	PSMD3	0.57858	0.012354
6502	SKP2	0.57867	0.0051753
7840	ALMS1	0.57887	0.028989
2842	GPR19	0.58033	0.010534
23064	SETX	0.58176	0.001321
5883	RAD9A	0.58267	0.0012849
1298	COL9A2	0.5833	0.014611
1676	DFFA	0.58337	0.00126
3037	HAS2	0.58391	0.0012422
3931	LCAT	0.58459	0.040744
5922	RASA2	0.58563	0.0011795
60436	TGIF2	0.58569	0.0031176
27130	INVS	0.5857	0.018153
4488	MSX2	0.58571	0.0011689
3984	LIMK1	0.5866	0.0012021
9015	TAF1A	0.58804	0.018121
5450	POU2AF1	0.58996	0.0012835
116039	OSR2	0.59134	0.0010265
6883	TAF12	0.59216	0.0010566
9014	TAF1B	0.59377	0.0009567
22890	ZBTB1	0.59468	0.0010107
10945	KDELR1	0.59553	0.00097747
10434	LYPLA1	0.5961	0.025179
9674	KIAA0040	0.59613	0.02759
4436	MSH2	0.59845	0.01937
4007	PRICKLE3	0.59896	0.003078
444	ASPH	0.5995	0.018347
9818	NUPL1	0.60048	0.00085601
6560	SLC12A4	0.60088	0.0010566
719	C3AR1	0.60321	0.013706
27000	DNAJC2	0.60322	0.00080686
22941	SHANK2	0.60333	0.00079809
396	ARHGDIA	0.60418	0.033565
1017	CDK2	0.6049	0.023933
2274	FHL2	0.60499	0.00080716
839	CASP6	0.60521	0.00079187
378708	APITD1	0.60549	0.00078729
7319	UBE2A	0.60582	0.0031988
9587	MAD2L1BP	0.60613	0.00077331
5927	KDM5A	0.60641	0.00077118
4125	MAN2B1	0.60765	0.015806
9469	CHST3	0.6081	0.026394
1522	CTSZ	0.60861	0.00077024
9662	CEP135	0.61234	0.00067182
9466	IL27RA	0.61281	0.036641
30849	PIK3R4	0.61302	0.023428
6793	STK10	0.61366	0.00065454
5890	RAD51B	0.61562	0.0006128
3964	LGALS8	0.6167	0.00062199
5165	PDK3	0.61674	0.0033805
22861	NLRP1	0.61691	0.00061993
10621	POLR3F	0.61701	0.00059206
6944	VPS72	0.61742	0.027318
4792	NFKBIA	0.61832	0.0005865
5996	RGS1	0.61832	0.0005865
10573	MRPL28	0.61853	0.041222
5511	PPP1R8	0.61877	0.043474
6940	ZNF354A	0.61884	0.014567
7415	VCP	0.61923	0.0006013
80184	CEP290	0.6212	0.033632
2521	FUS	0.62156	0.0015538
7076	TIMP1	0.62221	0.00055852
2956	MSH6	0.62259	0.00054426
908	CCT6A	0.62423	0.026852
7011	TEP1	0.62534	0.011236
713	C1QB	0.62575	0.031916
25807	RHBDD3	0.62576	0.0013617
6421	SFPQ	0.62636	0.0038713
27346	TMEM97	0.62786	0.00060366
1823	DSC1	0.62795	0.025203
4920	ROR2	0.62809	0.017799
633	BGN	0.62864	0.00046291
6885	MAP3K7	0.62896	0.0004601
1230	CCR1	0.62945	0.00045468
57187	THOC2	0.63012	0.040721
64116	SLC39A8	0.63091	0.00044772
5194	PEX13	0.63146	0.0065867
55720	TSR1	0.6315	0.040319
2965	GTF2H1	0.63186	0.00044772
833	CARS	0.63244	0.00048958
9516	LITAF	0.63252	0.00043344
10330	CNPY2	0.63261	0.00041434
7551	ZNF3	0.63283	0.00043468
23180	RFTN1	0.63473	0.0030626
26173	INTS1	0.63477	0.003078
2054	STX2	0.63666	0.047944
6434	TRA2B	0.63735	0.00039607
8939	FUBP3	0.63741	0.049026
7046	TGFBR1	0.6387	0.046616
1452	CSNK1A1	0.63885	0.0073621
2731	GLDC	0.64003	0.0020612
1627	DBN1	0.6404	0.0072346
988	CDC5L	0.64067	0.00035124
4946	OAZ1	0.64198	0.00033243
2137	EXTL3	0.64222	0.029721
4247	MGAT2	0.64447	0.0044027
204	AK2	0.64543	0.00030991
29966	STRN3	0.64622	0.0041808
11231	SEC63	0.64661	0.012045
3206	HOXA10	0.64714	0.024254
3301	DNAJA1	0.64716	0.011364
2005	ELK4	0.64774	0.0033656
2520	GAST	0.64862	0.013517
55573	CDV3	0.65098	0.00027845
23512	SUZ12	0.65171	0.00025886
9100	USP10	0.65443	0.00025998
10938	EHD1	0.65484	0.00025516
4738	NEDD8	0.65492	0.011046
2585	GALK2	0.65669	0.0019031
4060	LUM	0.65757	0.036331
3099	HK2	0.65765	0.0032276
2533	FYB	0.65808	0.0018183
2564	GABRE	0.65844	0.0002344
28951	TRIB2	0.65859	0.00028486
3159	HMGA1	0.65897	0.0019025
23404	EXOSC2	0.65906	0.00025149
8634	RTCD1	0.6606	0.00021747
1041	CDSN	0.66109	0.00021947
860	RUNX2	0.66139	0.0259
23424	TDRD7	0.66218	0.00021992
90957	DHX57	0.6622	0.0034452
7414	VCL	0.66369	0.00020136
6132	RPL8	0.6645	0.00049528
2118	ETV4	0.66457	0.030018
8566	PDXK	0.66467	0.016824
6810	STX4	0.66469	0.00022566
10577	NPC2	0.66681	0.013706
114908	TMEM123	0.66794	0.00018465
5636	PRPSAP2	0.66986	0.0067533
157680	VPS13B	0.67055	0.0054045
2189	FANCG	0.67055	0.016933
5719	PSMD13	0.67134	0.039564
7803	PTP4A1	0.67168	0.00016503
7297	TYK2	0.67229	0.043486
4591	TRIM37	0.67268	0.0009187
8986	RPS6KA4	0.67412	0.039386
5982	RFC2	0.67465	0.00016093
6895	TARBP2	0.67465	0.036456
6576	SLC25A1	0.67484	0.0001665
10549	PRDX4	0.67499	0.00016448
7705	ZNF146	0.6761	0.04455
60312	AFAP1	0.6772	0.00015657
9874	TLK1	0.67768	0.015394
23212	RRS1	0.67815	0.015025
11245	GPR176	0.67872	0.00054426
3595	IL12RB2	0.67891	0.00015189
5366	PMAIP1	0.67908	0.00013896
29114	TAGLN3	0.67942	0.036413
6382	SDC1	0.68147	0.0090968
55621	TRMT1	0.68165	0.00013488
3949	LDLR	0.68347	0.00013172
6618	SNAPC2	0.68405	0.000132
10312	TCIRG1	0.68408	0.00012884
11234	HPS5	0.68418	0.00012045
55832	CAND1	0.68424	0.00046318
2149	F2R	0.68599	0.042433
27097	TAF5L	0.68741	0.00011499
4172	MCM3	0.68801	0.018747
8518	IKBKAP	0.6883	0.00011495
10261	IGSF6	0.68865	0.0068691
10001	MED6	0.68973	0.00011731
84243	ZDHHC18	0.69143	0.0057545
259217	HSPA12A	0.6927	0.00010689
3073	HEXA	0.69312	0.00010472
131578	LRRC15	0.69329	0.020054
10244	RABEPK	0.69382	0.00010409
10762	NUP50	0.69424	0.001138
694	BTG1	0.6944	0.018923
613	BCR	0.69483	0.00010147
5082	PDCL	0.69563	0.0026995
2737	GLI3	0.69588	0.00010097
6556	SLC11A1	0.69589	0.018713
5476	CTSA	0.69612	0.045678
1981	EIF4G1	0.69723	9.6508e-05
8336	HIST1H2AM	0.69724	0.023664
8650	NUMB	0.69735	8.9595e-05
8754	ADAM9	0.69796	0.024456
29894	CPSF1	0.70039	8.5296e-05
8570	KHSRP	0.70051	0.0025186
53	ACP2	0.70054	0.0037244
5970	RELA	0.70156	0.0011784
348	APOE	0.70239	0.015235
27079	RPUSD2	0.70298	8.2636e-05
7270	TTF1	0.70299	7.8225e-05
9656	MDC1	0.70304	0.036456
1962	EHHADH	0.70728	7.4544e-05
10548	TM9SF1	0.70897	0.025347
5106	PCK2	0.70953	0.020624
10154	PLXNC1	0.70973	0.0074379
4841	NONO	0.71041	6.637e-05
6472	SHMT2	0.71286	0.0099597
5058	PAK1	0.71585	6.2173e-05
10592	SMC2	0.71641	0.00092848
8216	LZTR1	0.71647	0.0038473
7476	WNT7A	0.7166	0.045678
7718	ZNF165	0.71806	0.026865
9185	REPS2	0.71906	0.046511
3344	FOXN2	0.71951	0.029097
142	PARP1	0.72018	0.0014237
25940	FAM98A	0.72097	5.1879e-05
5834	PYGB	0.72172	0.029998
8496	PPFIBP1	0.72247	4.9022e-05
2130	EWSR1	0.72358	0.0089346
3014	H2AFX	0.72473	0.036663
2792	GNGT1	0.72479	0.0010832
80308	FLAD1	0.72541	0.00088873
476	ATP1A1	0.72551	0.01683
6385	SDC4	0.72556	0.036462
23380	SRGAP2	0.72578	0.045024
4331	MNAT1	0.72741	0.040529
6526	SLC5A3	0.72844	4.3858e-05
1591	CYP24A1	0.72887	0.0012422
1786	DNMT1	0.72937	0.045594
9790	BMS1	0.72944	4.3326e-05
1026	CDKN1A	0.72957	0.00011016
1717	DHCR7	0.73043	0.00055547
10495	ENOX2	0.73045	5.3285e-05
25758	C11orf41	0.73125	0.019074
23279	NUP160	0.73286	0.046711
10007	GNPDA1	0.7347	3.6961e-05
24	ABCA4	0.73501	3.7194e-05
977	CD151	0.7357	0.00126
51603	METTL13	0.73588	0.0010334
2673	GFPT1	0.73625	0.015038
8061	FOSL1	0.73626	0.019642
4296	MAP3K11	0.73649	3.465e-05
55916	NXT2	0.73667	0.0018278
2193	FARSA	0.73677	0.038984
8760	CDS2	0.73707	0.029829
8534	CHST1	0.73901	3.3427e-05
3987	LIMS1	0.73928	0.0029658
80777	CYB5B	0.74035	0.0023398
136	ADORA2B	0.74051	0.03618
56987	BBX	0.74255	0.0075217
5033	P4HA1	0.74278	0.00041548
10287	RGS19	0.74365	0.006673
56951	C5orf15	0.74369	0.00060837
23768	FLRT2	0.74474	2.7985e-05
24149	ZNF318	0.74609	2.8743e-05
1318	SLC31A2	0.7467	0.013985
3975	LHX1	0.74785	0.014735
9780	PIEZO1	0.74807	0.019273
9889	ZBED4	0.74834	0.021773
2077	ERF	0.75049	0.032697
79080	CCDC86	0.75187	0.017268
9197	SLC33A1	0.75262	0.039931
5878	RAB5C	0.75271	2.4425e-05
7013	TERF1	0.75291	0.012795
6238	RRBP1	0.75399	6.0305e-05
5290	PIK3CA	0.75479	2.3214e-05
79017	GGCT	0.75643	6.2103e-05
200081	TXLNA	0.75716	2.0684e-05
11322	TMC6	0.75873	0.031351
23531	MMD	0.75997	0.00024845
597	BCL2A1	0.76018	1.914e-05
9130	FAM50A	0.76025	1.9055e-05
8612	PPAP2C	0.76084	0.02673
11056	DDX52	0.76091	1.8172e-05
124565	SLC38A10	0.76137	4.3974e-05
26031	OSBPL3	0.76169	0.0044537
1108	CHD4	0.76281	1.7921e-05
8828	NRP2	0.76356	0.0256
127544	RNF19B	0.76393	0.00096122
9258	MFHAS1	0.76438	0.0014423
10384	BTN3A3	0.76476	1.7764e-05
8795	TNFRSF10B	0.76508	1.6381e-05
5784	PTPN14	0.7654	0.0088806
10097	ACTR2	0.76844	0.047881
5985	RFC5	0.76875	0.028579
7112	TMPO	0.76987	0.00048827
8034	SLC25A16	0.77	1.4967e-05
10745	PHTF1	0.77031	0.037534
10263	CDK2AP2	0.77038	1.5152e-05
841	CASP8	0.77127	0.016189
6868	ADAM17	0.77181	0.0064473
471	ATIC	0.7724	0.039386
4283	CXCL9	0.77247	0.0036513
6499	SKIV2L	0.77302	0.0015012
6525	SMTN	0.77323	0.010502
5424	POLD1	0.77451	0.014973
55752	SEPT11	0.77554	1.3497e-05
8702	B4GALT4	0.77621	3.7997e-05
5905	RANGAP1	0.77638	0.045005
54107	POLE3	0.77674	0.0013588
2176	FANCC	0.77723	1.2448e-05
79109	MAPKAP1	0.77843	0.0094448
5475	PPEF1	0.77911	0.00045889
23468	CBX5	0.7796	0.00095783
25816	TNFAIP8	0.77981	0.0058302
4800	NFYA	0.78205	0.0015229
65220	NADK	0.78231	0.022795
1308	COL17A1	0.78323	0.049087
9973	CCS	0.78367	9.9988e-06
9056	SLC7A7	0.78391	0.00078549
5324	PLAG1	0.78435	0.014628
7296	TXNRD1	0.78453	0.027303
3904	LAIR2	0.78541	0.019809
55361	PI4K2A	0.78581	0.0256
10726	NUDC	0.78637	0.0001187
81875	ISG20L2	0.78788	0.015711
321	APBA2	0.78806	9.6315e-06
1716	DGUOK	0.78839	0.023664
4763	NF1	0.78957	0.024519
5939	RBMS2	0.78991	0.00059296
6573	SLC19A1	0.79082	0.00046328
7165	TPD52L2	0.79122	9.0392e-06
29901	SAC3D1	0.79165	8.9007e-06
285527	FRYL	0.79294	0.00011158
8344	HIST1H2BE	0.79304	0.00091257
3566	IL4R	0.79361	0.03324
5716	PSMD10	0.79476	0.049311
80347	COASY	0.79494	0.018283
10269	ZMPSTE24	0.79502	1.1396e-05
81620	CDT1	0.79535	0.018283
5725	PTBP1	0.79579	0.012007
4076	CAPRIN1	0.79644	0.013294
9926	LPGAT1	0.79669	7.5974e-06
4791	NFKB2	0.79735	7.3686e-06
7474	WNT5A	0.79857	0.030835
7913	DEK	0.79916	0.023544
5998	RGS3	0.79988	6.9075e-06
8969	HIST1H2AG	0.80002	0.00016093
400506	C16orf88	0.80017	0.0010789
5707	PSMD1	0.80097	0.0025536
65243	ZNF643	0.80119	0.0031673
10036	CHAF1A	0.80185	0.037285
5496	PPM1G	0.80312	1.8559e-05
27429	HTRA2	0.80321	0.015178
6804	STX1A	0.8033	0.04801
406	ARNTL	0.80397	5.6557e-06
10963	STIP1	0.80408	6.303e-06
10484	SEC23A	0.80605	0.021624
7171	TPM4	0.80621	0.0066467
6240	RRM1	0.80684	0.014395
26155	NOC2L	0.80689	5.6162e-06
4072	EPCAM	0.80771	0.0024786
8140	SLC7A5	0.80851	0.017858
27242	TNFRSF21	0.80904	5.6557e-06
8728	ADAM19	0.80919	0.0052757
55183	RIF1	0.81013	4.8007e-06
5445	PON2	0.81032	0.00037351
952	CD38	0.81186	0.039917
5091	PC	0.81225	0.0032846
23080	AVL9	0.81267	0.04047
11260	XPOT	0.81269	0.0010968
6653	SORL1	0.81272	0.01317
55661	DDX27	0.81278	4.9777e-06
7443	VRK1	0.81308	0.010613
2356	FPGS	0.81353	8.9779e-05
22883	CLSTN1	0.81405	0.0062788
1509	CTSD	0.81453	0.0019048
23313	KIAA0930	0.81472	0.002423
5499	PPP1CA	0.81568	0.041219
27348	TOR1B	0.81759	0.042715
5218	CDK14	0.81837	0.0036186
23518	R3HDM1	0.81902	0.00087618
5339	PLEC	0.81907	0.0012422
51042	ZNF593	0.82003	3.9905e-06
11113	CIT	0.82025	0.001276
11047	ADRM1	0.82031	0.0024745
10528	NOP56	0.82035	0.0024932
4893	NRAS	0.82156	0.039656
3455	IFNAR2	0.82226	3.7145e-06
638	BIK	0.82404	0.0060985
571	BACH1	0.82475	3.5037e-06
23541	SEC14L2	0.82494	0.015379
79022	TMEM106C	0.82496	0.0055187
1912	PHC2	0.82702	3.2431e-06
5704	PSMC4	0.82935	3.4956e-05
93594	WDR67	0.82985	0.022281
92856	IMP4	0.83062	8.4797e-06
9048	ARTN	0.83102	0.023756
22823	MTF2	0.83103	2.7057e-06
9221	NOLC1	0.8333	0.0011703
8565	YARS	0.83391	1.2666e-05
4600	MX2	0.83399	0.023756
50810	HDGFRP3	0.8342	0.022401
2583	B4GALNT1	0.83503	0.025126
23381	SMG5	0.83701	0.0077741
2207	FCER1G	0.83754	0.0045407
54541	DDIT4	0.83771	2.4611e-06
2720	GLB1	0.83776	2.3668e-06
201562	PTPLB	0.83849	0.041915
3480	IGF1R	0.8406	2.0344e-06
133	ADM	0.841	0.0030839
4683	NBN	0.8419	0.0001387
3553	IL1B	0.84306	0.00055454
11077	HSF2BP	0.8436	0.0018678
4758	NEU1	0.84434	0.00077137
3607	FOXK2	0.84612	0.024254
23499	MACF1	0.84674	1.8843e-06
11006	LILRB4	0.84695	1.9372e-06
10534	SSSCA1	0.84727	0.0044307
1660	DHX9	0.8476	0.000453
51366	UBR5	0.84792	7.219e-05
26154	ABCA12	0.84809	0.0089346
81688	C6orf62	0.8492	0.0038842
9570	GOSR2	0.84973	0.0019031
6621	SNAPC4	0.85024	0.00014508
4201	MEA1	0.85174	0.0004062
5266	PI3	0.85176	0.032369
10625	IVNS1ABP	0.85265	0.018502
23196	FAM120A	0.85309	0.00012737
8343	HIST1H2BF	0.85439	3.6576e-05
4907	NT5E	0.85541	1.3974e-06
10992	SF3B2	0.85731	1.3954e-06
4811	NID1	0.85739	1.256e-06
1116	CHI3L1	0.85745	0.0038057
822	CAPG	0.85803	0.033284
5987	TRIM27	0.85912	1.3137e-06
10926	DBF4	0.86076	0.005057
9618	TRAF4	0.86157	7.216e-06
10227	MFSD10	0.86262	0.015379
8608	RDH16	0.86275	0.0011364
1192	CLIC1	0.86394	0.049501
857	CAV1	0.86414	0.0037675
23760	PITPNB	0.865	0.047026
4521	NUDT1	0.8651	0.014402
1072	CFL1	0.86713	0.0062333
10457	GPNMB	0.86727	0.00020536
2968	GTF2H4	0.86895	0.039564
51490	C9orf114	0.87025	0.00014062
5433	POLR2D	0.87077	0.0068788
8467	SMARCA5	0.87179	0.024544
2535	FZD2	0.8722	0.010099
6629	SNRPB2	0.87344	0.033419
9262	STK17B	0.8761	2.1431e-05
6274	S100A3	0.87618	0.00033243
7277	TUBA4A	0.87627	0.019332
9170	LPAR2	0.8765	0.021071
9776	ATG13	0.87659	0.027393
10643	IGF2BP3	0.87673	0.0038998
7528	YY1	0.87682	0.029915
5469	MED1	0.87917	7.6177e-07
9019	MPZL1	0.88128	0.00010586
3861	KRT14	0.88198	0.001825
57007	CXCR7	0.88257	0.016908
24145	PANX1	0.88355	0.016189
682	BSG	0.88421	0.00056456
11339	OIP5	0.88605	0.00093922
27341	RRP7A	0.88628	5.9675e-07
8550	MAPKAPK5	0.88641	5.9307e-07
8202	NCOA3	0.88667	5.8143e-07
3796	KIF2A	0.88823	0.017356
10272	FSTL3	0.88975	0.016908
9500	MAGED1	0.89232	0.02622
24140	FTSJ1	0.89351	0.00077118
11116	FGFR1OP	0.89374	0.00015662
26509	MYOF	0.89427	0.037534
115353	LRRC42	0.89545	0.018253
4643	MYO1E	0.89664	0.013139
56005	C19orf10	0.89781	4.1652e-06
701	BUB1B	0.89909	0.034091
1029	CDKN2A	0.89993	0.0039681
8455	ATRN	0.90017	3.6945e-07
9675	TTI1	0.90179	0.0039501
1025	CDK9	0.90198	0.0090968
7130	TNFAIP6	0.90233	0.026551
10955	SERINC3	0.90288	3.2386e-07
7979	SHFM1	0.9036	0.0099782
4015	LOX	0.90369	0.0011699
10059	DNM1L	0.90567	3.4927e-07
4957	ODF2	0.90613	0.00048972
3620	IDO1	0.90641	0.018585
5871	MAP4K2	0.90656	0.030453
840	CASP7	0.90734	0.0014304
26047	CNTNAP2	0.90882	0.00026236
8744	TNFSF9	0.90905	3.1084e-07
3433	IFIT2	0.90915	3.6946e-05
1659	DHX8	0.90953	3.1236e-07
865	CBFB	0.9099	5.075e-06
5050	PAFAH1B3	0.90992	2.968e-07
1009	CDH11	0.91043	2.9066e-07
2799	GNS	0.91095	4.3477e-07
9619	ABCG1	0.91253	0.035042
8487	GEMIN2	0.91354	9.4384e-06
8519	IFITM1	0.91445	0.047272
4628	MYH10	0.91477	2.3687e-07
10262	SF3B4	0.91541	0.0089416
389	RHOC	0.91736	2.2531e-07
1965	EIF2S1	0.91876	0.001026
7424	VEGFC	0.9193	6.0366e-05
3055	HCK	0.91942	0.0014382
4174	MCM5	0.92011	0.042358
3659	IRF1	0.92067	0.028579
126353	C19orf21	0.92092	0.0074699
3309	HSPA5	0.92106	0.02158
8563	THOC5	0.92191	0.00010147
4839	NOP2	0.92199	1.9791e-07
90	ACVR1	0.92245	0.044593
7071	KLF10	0.92345	0.00020427
5230	PGK1	0.92529	6.01e-07
5315	PKM2	0.92594	1.9602e-07
858	CAV2	0.92796	0.011197
8379	MAD1L1	0.92808	2.2211e-05
5965	RECQL	0.9283	0.0056529
26872	STEAP1	0.93	1.4258e-07
81611	ANP32E	0.93002	0.0039389
2316	FLNA	0.93069	6.1837e-05
4140	MARK3	0.93115	0.035554
347902	AMIGO2	0.93148	0.015891
9446	GSTO1	0.9331	1.4752e-07
23070	FTSJD2	0.93428	3.3666e-05
26585	GREM1	0.93443	0.024427
4074	M6PR	0.9357	0.0024554
811	CALR	0.9359	0.038995
7187	TRAF3	0.93656	0.0011353
3669	ISG20	0.93683	0.0040171
23516	SLC39A14	0.93954	0.011076
11073	TOPBP1	0.94033	0.0020247
27230	SERP1	0.9428	5.9793e-05
6241	RRM2	0.94387	0.0067516
10409	BASP1	0.94433	0.030986
5810	RAD1	0.94462	0.00024413
6744	SSFA2	0.94475	0.010879
101	ADAM8	0.94514	6.6643e-05
29957	SLC25A24	0.94544	4.2351e-05
10175	CNIH	0.94653	9.1147e-08
6617	SNAPC1	0.94653	0.0029958
3992	FADS1	0.94688	0.023574
5437	POLR2H	0.94751	0.027575
6273	S100A2	0.9484	0.006764
7408	VASP	0.9487	0.008364
11010	GLIPR1	0.94889	7.8573e-08
6596	HLTF	0.9501	0.0022569
5999	RGS4	0.95022	1.4582e-06
5073	PARN	0.95026	0.00036506
5663	PSEN1	0.95054	0.00056584
116832	RPL39L	0.95196	2.5499e-05
3149	HMGB3	0.9526	0.025203
3012	HIST1H2AE	0.95288	0.026882
9601	PDIA4	0.95505	0.049693
4192	MDK	0.95527	0.0044027
8896	BUD31	0.95715	0.03094
8662	EIF3B	0.95801	7.449e-08
5436	POLR2G	0.96112	0.0040635
8444	DYRK3	0.96153	6.2305e-08
1019	CDK4	0.96237	0.011236
1164	CKS2	0.96343	0.036381
6474	SHOX2	0.96422	0.015011
942	CD86	0.96595	0.037171
23636	NUP62	0.96783	0.0025186
7936	RDBP	0.96918	6.767e-08
8821	INPP4B	0.96924	0.021678
4747	NEFL	0.97101	4.0428e-05
868	CBLB	0.97143	8.888e-06
10733	PLK4	0.97338	0.012358
116372	LYPD1	0.9735	0.0068691
3956	LGALS1	0.9737	0.005123
3589	IL11	0.97423	3.9467e-08
9929	JOSD1	0.97687	3.8418e-08
768	CA9	0.97761	0.00010627
9519	TBPL1	0.97853	7.2396e-07
7184	HSP90B1	0.97958	3.2443e-08
4836	NMT1	0.98237	0.012528
23167	EFR3A	0.98259	3.1324e-08
533	ATP6V0B	0.98306	0.009882
1281	COL3A1	0.98331	0.0067845
5031	P2RY6	0.98334	8.5582e-05
5695	PSMB7	0.98413	0.0044467
8632	DNAH17	0.98643	0.00039638
7518	XRCC4	0.98652	4.4306e-07
57720	GPR107	0.98891	0.0027253
11098	PRSS23	0.98944	4.9777e-06
206358	SLC36A1	0.99052	0.00017646
23231	SEL1L3	0.99065	0.00093922
5265	SERPINA1	0.99222	0.016964
3575	IL7R	0.99228	0.0057828
5111	PCNA	0.99464	0.037534
6782	HSPA13	0.99595	0.00011294
57862	ZNF410	0.9966	0.0001131
586	BCAT1	0.99778	0.044231
5538	PPT1	0.99847	1.8599e-08
26151	NAT9	0.99927	0.0043699
5624	PROC	0.9996	0.00065815
2050	EPHB4	1.0028	2.3185e-05
5692	PSMB4	1.0052	0.04054
800	CALD1	1.0063	1.4125e-08
4828	NMB	1.0064	5.0033e-05
1063	CENPF	1.0064	0.00014822
10576	CCT2	1.0077	6.6336e-05
7464	CORO2A	1.0086	1.4125e-08
11221	DUSP10	1.0087	1.349e-07
1861	TOR1A	1.0087	0.021386
641	BLM	1.0091	0.0012758
7533	YWHAH	1.0101	0.03062
10801	SEPT9	1.0126	1.2391e-08
124222	PAQR4	1.0161	0.0089525
4067	LYN	1.0162	1.652e-07
8091	HMGA2	1.0176	9.7735e-09
5971	RELB	1.0177	9.7431e-09
285	ANGPT2	1.0187	0.0052842
10024	TROAP	1.0187	0.0074923
9128	PRPF4	1.0196	0.031897
10492	SYNCRIP	1.0212	0.00097747
10635	RAD51AP1	1.0217	0.0023861
1871	E2F3	1.0218	8.8095e-09
55041	PLEKHB2	1.023	8.1345e-09
1497	CTNS	1.0248	4.6045e-05
6929	TCF3	1.0253	0.0057829
1293	COL6A3	1.0256	0.00054426
6892	TAPBP	1.0271	0.00016877
5699	PSMB10	1.028	0.013828
29855	UBN1	1.0297	4.4741e-05
10953	TOMM34	1.0311	6.7507e-09
11015	KDELR3	1.0318	0.018303
8942	KYNU	1.032	7.0603e-09
10436	EMG1	1.0325	6.6894e-05
8614	STC2	1.0335	1.4582e-05
23306	TMEM194A	1.0341	6.1532e-09
636	BICD1	1.035	0.0005873
5966	REL	1.0361	1.3691e-07
7472	WNT2	1.0375	0.022569
5685	PSMA4	1.0382	0.0081006
100	ADA	1.0387	8.1253e-06
5782	PTPN12	1.0398	0.049399
2512	FTL	1.0404	1.263e-08
7298	TYMS	1.0407	0.030455
1810	DR1	1.0422	0.043947
7355	SLC35A2	1.0432	0.0014936
4001	LMNB1	1.0443	0.0044411
1514	CTSL1	1.0498	3.4259e-09
7372	UMPS	1.05	0.0021202
672	BRCA1	1.0503	0.00018309
1464	CSPG4	1.0504	5.6396e-05
10970	CKAP4	1.051	1.5853e-05
7546	ZIC2	1.0514	0.03157
675	BRCA2	1.0518	0.01206
23028	KDM1A	1.053	0.0024932
5479	PPIB	1.0548	1.2337e-06
22990	PCNX	1.0551	0.045024
7039	TGFA	1.0562	0.006761
7107	GPR137B	1.0566	0.00089105
1841	DTYMK	1.0588	0.0086151
2553	GABPB1	1.0613	2.591e-09
6195	RPS6KA1	1.0618	2.6009e-09
6183	MRPS12	1.0627	2.367e-09
55346	TCP11L1	1.0631	0.00227
1736	DKC1	1.0633	4.8007e-09
1278	COL1A2	1.0633	0.042331
3704	ITPA	1.0642	0.00451
5352	PLOD2	1.0645	0.0093238
2023	ENO1	1.065	0.049447
4686	NCBP1	1.0657	1.7272e-08
2491	CENPI	1.066	0.00013488
[truncated: 445 more rows]
[truncated: 4 more columns]
